# Supplementary material for: Sequencing of the variable region of rpsB to discriminate between Streptococcus pneumoniae and other streptococcal species
Source: PubMed Central journal article supplement (PMC5627049; doi:10.1098/rsob.170074), 2017-09-20
Supplement: rsob170074supp2.pdf [file rsob170074supp2.pdf]

**Supplementary Table S2.** Number (%) of non-pneumococcal streptococcal strains positive when tested in molecular assays for common pneumococcal molecular targets.

| Source of strain <sup>a</sup> | all        | <i>lytA</i> | <i>piaB</i> | <i>ply</i>     | <i>cpsA</i>    | Spn9802      | <i>zmpC</i> <sup>b</sup><br>(500 bp) | <i>zmpC</i><br>(5kb bp) | <i>zmpC</i><br>(8kb bp) | qPCR<br>serotype | CST<br>serotype |
|-------------------------------|------------|-------------|-------------|----------------|----------------|--------------|--------------------------------------|-------------------------|-------------------------|------------------|-----------------|
| <b>Disease</b>                | 101        | 0           | 0           | 8 (8)          | 1 (1)          | 4 (4)        | 1 (1)                                | 0                       | 0                       | 1 (1)            | 0               |
| <b>Carriage</b>               | 103        | 0           | 0           | 14 (14)        | 0              | 0            | 6 (6)                                | 2 (2)                   | 0                       | 4 (4)            | 0               |
| <b>Overall</b>                | <b>204</b> | <b>0</b>    | <b>0</b>    | <b>22 (10)</b> | <b>1 (0.5)</b> | <b>4 (2)</b> | <b>7 (3)</b>                         | <b>2 (1)</b>            | <b>0</b>                | <b>5 (2)</b>     | <b>0</b>        |

<sup>a</sup>strains annotated as non-pneumococci based on sequence analysis of the ribosomal S2 gene.

<sup>b</sup>strains which generated amplicons with 100% sequence homology to published sequences for *S. pneumoniae*.
