# Supplementary material for: Sequencing of the variable region of rpsB to discriminate between Streptococcus pneumoniae and other streptococcal species
Source: PubMed Central journal article supplement (PMC5627049; doi:10.1098/rsob.170074), 2017-09-20
Supplement: rsob170074supp3.pdf [file rsob170074supp3.pdf]

In the current study, examination of 1157 S2 sequences extracted from invasive *Streptococcus pneumoniae* whole genomes revealed that except for one, all S2-sequences grouped together. The exception was an S2-sequence from a pneumococcal isolate serotype 35B (2060880) from CSF, which was identical to that of *S. mitis* SK575. The blood isolate of the same patient had the same serotype and S2-type. To confirm the species of this strain, we performed *in silico* DNA hybridisation using the recommended formula and the Genome-To-Genome Distance Calculator (<http://ggdc.dsmz.de/distcalc2.php>) (1).

**DNA-DNA hybridisation (DDH) estimate (in silico) (GLM-based) (identities / High-scoring Segment Pair (HSP) length)**

| Strain                           | 2060880               | 2070268               | 2100466               | 2120989               | <i>S. mitis</i> SK575 |
|----------------------------------|-----------------------|-----------------------|-----------------------|-----------------------|-----------------------|
| <i>S. pneumoniae</i> TIGR4       | 87.30% [84.7 - 89.5%] | 87.40% [84.9 - 89.6%] | 87.40% [84.8 - 89.6%] | 87.70% [85.1 - 89.8%] | 47.80% [45.2 - 50.4%] |
| <i>S. pneumoniae</i> D39         | 92.90% [90.1 - 94.9%] | 88.80% [86.3 - 90.8%] | 88.70% [86.3 - 90.8%] | 88.90% [86.5 - 90.9%] | 43.00% [40.5 - 45.6%] |
| <i>S. pneumoniae</i> 35B 2060880 | 100.00% [100 - NaN%]  | 88.90% [86.4 - 90.9%] | 88.70% [86.3 - 90.8%] | 89.00% [86.6 - 91%]   | 39.50% [37.1 - 42.1%] |
| <i>S. pneumoniae</i> 35B 2070268 |                       | 100.00% [100 - NaN%]  | 99.00% [98.5 - 99.4%] | 99.40% [99 - 99.6%]   | 47.20% [44.6 - 49.8%] |
| <i>S. pneumoniae</i> 35B 2100466 |                       |                       | 100.00% [100 - NaN%]  | 99.10% [98.6 - 99.4%] | 47.00% [44.5 - 49.6%] |
| <i>S. pneumoniae</i> 35B 2120989 |                       |                       |                       | 100.00% [100- %]      | 47.00% [44.5 - 49.6%] |
| <i>S. mitis</i> SK575            |                       |                       |                       |                       | 100.00% [100 - %]     |

**Probability of being the same species (identities / HSP length)**

| Strain                           | 2060880 | 2070268 | 2100466 | 2120989 | <i>S. mitis</i> SK575 |
|----------------------------------|---------|---------|---------|---------|-----------------------|
| <i>S. pneumoniae</i> TIGR4       | 94.78%  | 94.84%  | 94.81%  | 94.93%  | 13.54%                |
| <i>S. pneumoniae</i> D39         | 98.16%  | 95.36%  | 95.34%  | 95.41%  | 5.47%                 |
| <i>S. pneumoniae</i> 35B 2060880 | 98.30%  | 95.39%  | 95.34%  | 95.45%  | 2.41%                 |
| <i>S. pneumoniae</i> 35B 2070268 |         | 99.60%  | 98.07%  | 98.14%  | 27.20%                |
| <i>S. pneumoniae</i> 35B 2100466 |         |         | 98.30%  | 98.08%  | 11.94%                |
| <i>S. pneumoniae</i> 35B 2120989 |         |         |         | 98.30%  | 11.95%                |
| <i>S. mitis</i> SK575            |         |         |         |         | 98.30%                |

**Reference**

1. Meier-Kolthoff JP, Auch AF, Klenk H-P, Göker M. Genome sequence-based species delimitation with confidence intervals and improved distance functions. BMC Bioinformatics. 2013;14(1):60.
